# Supplementary material
Source: PubMed Central journal article supplement (PMC1500842)

Supplementary Material for Lu *et al.* *Structural flexibility of F plasmid TraM*

**Fig. 1 (A)** A stereo view of the overall structural alignment of TraM<sup>58-127</sup> (green) and TraM<sup>58-127</sup>-E88L (yellow). **(B)** A stereo view of the  $2F_0-F_c$  electron density map contoured at  $1.5\sigma$ , showing residues Ile87 and Leu88 in a tetramer of TraM<sup>58-127</sup>-E88L.

# Supplementary figure 1

**A**

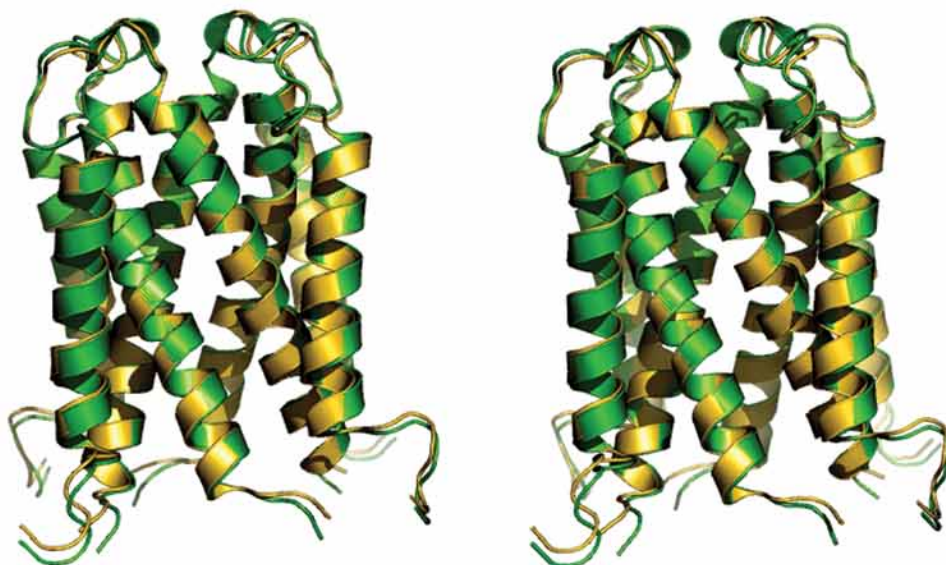

**B**

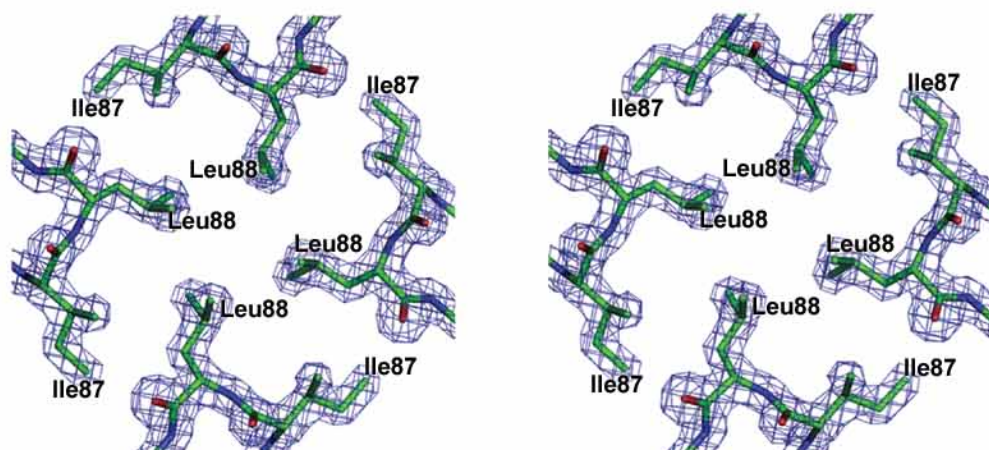

Supplement: 7601151s1.pdf [file 7601151s1.pdf]
